# Supplementary material for: The BAH domain of Rsc2 is a histone H3 binding domain
Source: PubMed Central journal article supplement — Nucleic Acids Res. 2013 Jul 31;41(19):9168–82. doi: 10.1093/nar/gkt662 (PMC3799432; doi:10.1093/nar/gkt662), 2013-07-31
Supplement: supp_gkt662_nar-01637-h-2013-File009.pdf [file supp_gkt662_nar-01637-h-2013-File009.pdf]

## Supplemental Material

### The BAH domain of Rsc2 is a histone H3 binding domain

Anna L. Chambers, Laurence H. Pearl, Antony W. Oliver, and Jessica A. Downs

**Table S1. Mean enrichment of Rsc2-myc proteins by ChIP expressed as % of input. Data for untagged control samples are shown in brackets. ND = not determined.**

| Locus        | Full-length Rsc2 | Rsc2-BAH-CT1 | BAH-CT1-W436A | BAH-CT1-W436L | BAH-CT1-K437E |
|--------------|------------------|--------------|---------------|---------------|---------------|
| <b>25S</b>   | 2.2 (0.3)        | ND           | ND            | ND            | ND            |
| <b>Epro</b>  | 0.2 (0.05)       | ND           | ND            | ND            | ND            |
| <b>CAR</b>   | 17.9 (0.9)       | ND           | ND            | ND            | ND            |
| <b>18S-A</b> | 2.6 (0.1)        | ND           | ND            | ND            | ND            |
| <b>18S-B</b> | 1.1 (0.1)        | 3.0 (0.6)    | 2.2 (0.6)     | 2.4 (0.6)     | 3.0 (0.6)     |
| <b>HTA1</b>  | 19.3 (0.3)       | 15 (1.8)     | 3.1 (1.8)     | 1.9 (1.8)     | 11.56 (1.8)   |
| <b>HTZ1</b>  | ND               | 10 (0.3)     | 3.2 (0.3)     | 2.7 (0.3)     | 6.7 (0.3)     |

**Table S2. Yeast strains used in this study**

| Strain              | Genotype                                                                                                                                                                                                                          | Reference                                                    |
|---------------------|-----------------------------------------------------------------------------------------------------------------------------------------------------------------------------------------------------------------------------------|--------------------------------------------------------------|
| DMY2804             | W303a <i>RDN1-NTS1::mURA3</i>                                                                                                                                                                                                     | (1)                                                          |
| DMY2835             | <i>sir2::Kan<sup>R</sup></i> in DMY2804                                                                                                                                                                                           | (2)                                                          |
| JDY790              | <i>rsc2::KanMX6</i> in DMY2804                                                                                                                                                                                                    | This study                                                   |
| JDY822              | <i>rsc2::TRP1</i> in DMY2835                                                                                                                                                                                                      | This study                                                   |
| YNK179-191          | <i>rsc2::KanMX6</i> in JKM179 ( <i>MAT<math>\alpha</math>, ade1-100, leu2-3,112, lys5, trp1::hisG, ura3-52, ho<math>\Delta</math>, hml<math>\Delta</math>, hmr<math>\Delta</math>, ade3::GAL1pro::HO</i> )                        | (3)                                                          |
| <i>rsc2</i> -BY4741 | <i>rsc2::KanMX4</i> in BY4741                                                                                                                                                                                                     | Euroscarf deletion collection                                |
| YB109               | <i>MAT<math>\alpha</math> ura3-52 his3-<math>\Delta</math>200 ade2-101 trp1-<math>\Delta</math>1 gal3<sup>-</sup> leu2-3, 112 GAL1::his3-<math>\Delta</math>5' trp1::his3-<math>\Delta</math>3':HOcs lys2<sup>-</sup> (leaky)</i> | (4)                                                          |
| JPY12               | <i>MAT<math>\alpha</math> his3-200 leu2-1 lys2-0 trp1-63 ura3-167 met15-0 ade2::hisG RDN1::mURA3/HIS3 RDN1::Ty1-Met15 TELV::ADE2 hht2-hhf2::hygMX hht1 hhf1::natMX pJP11 (LYS2 CEN HHT1-HHF1)</i>                                 | (5)                                                          |
| JDY826              | As JPY12, but with pJP15-A75V ( <i>LEU2 CEN hht1-A75V HHF1</i> ) instead of pJP11                                                                                                                                                 | This study (Plasmid was kind gift of J. Boeke and A. Norris) |

**Table S3. Yeast plasmids used in this study**

| Plasmid            | Name    | Description                                                                                                             |
|--------------------|---------|-------------------------------------------------------------------------------------------------------------------------|
| pRsc2-myc          | pJD629  | <i>RSC2</i> with 13-myc C-terminal tag under the control of its own promoter with <i>TRP1</i> marker in pRS416 backbone |
| pRsc2-W436A-myc    | pJD755  | As pJD629 but with W436E substitution                                                                                   |
| pRsc2-W436L-myc    | pJD756  | As pJD629 but with W436L substitution                                                                                   |
| pRsc2-K437E-myc    | pJD757  | As pJD629 but with K437E substitution                                                                                   |
| p413GPD (EV)       | p413GPD | Empty vector - contains GAPDH constitutive promoter (ATCC 87354)                                                        |
| pGPD-BAH-CT1-myc   | pJD625  | Overexpression plasmid of Rsc2 BAH-CT1 (aa 401-641) with a C-terminal 13-myc tag cloned into p413GPD                    |
| p413-ADHmyc (EV)   | pJD616  | Empty vector – contains ADH constitutive promoter (ATCC 87370), and 13myc repeat (not expressed)                        |
| pADH-BAH-CT1-myc   | pJD621  | Overexpression plasmid with BAH-CT1 (aa 410-641) cloned into pJD616, with C-terminal in-frame myc tag                   |
| pADH-BAH-W436A-myc | pJD758  | As pJD621 but with W436A substitution                                                                                   |
| pADH-BAH-W436L-myc | pJD761  | As pJD621 but with W436L substitution                                                                                   |
| pADH-BAH-K437E-myc | pJD760  | As pJD621 but with K437E substitution                                                                                   |

**Yeast plasmid construction**

*RSC2* coding sequence and DNA 700 bp upstream and 200 bp downstream was amplified from genomic DNA and cloned into pRS416 to generate pJD578. pJD629 was generated by introduction of a C-terminal 13-myc and *TRP1* into pJD578 using the method of (6).

Plasmids pJD755, pJD756 and pJD757 expressing C-terminally 13myc-tagged Rsc2 containing the substitutions W436A, W436L and K437E respectively, were created by site directed mutagenesis.

To create pJD616, 13-myc repeats were amplified by PCR and were cloned into the *Bam*HI site of p413ADH. The BAH-CT1 domain (aa401-641) coding sequence of Rsc2 was amplified by PCR and was cloned into the *Xba*I-*Bg*/II sites of pJD616 to generate pJD621. The BAH-CT1-myc cassette was subcloned from pJD621 into the GAPDH-promoter containing p413GPD to create pJD625. The W436A, W436L and K437E mutations were introduced into pJD621 by site directed mutagenesis to create pJD758, pJD761 and pJD760, respectively.

### **Recombinant protein expression plasmid construction**

For the recombinant His-BAH-CT1 expression plasmid, PCR primers were used to amplify the region encoding the BAH and CT1 domains of *S. cerevisiae* Rsc2 (amino acids 401-641) with additional flanking restriction sites (*Nde*I and *Xho*I) to facilitate cloning into the vector pTWO-E; an in-house modified pET-17b vector (Novagen) engineered to encode a N-terminal, 3C-protease cleavable, His<sub>6</sub> affinity tag.

The GST-tagged Rsc2 BAH-CT1 expression construct for pull-down assays was generated by subcloning from pTWO-E into pTHREE-E using the same restriction enzyme sites; pTHREE-E is an in-house modified pGEX-6P-1 vector (GE Healthcare). Mutations were introduced by site-directed mutagenesis.

To create the GST-BAH1<sup>BAF180</sup> construct, a synthetic gene construct was purchased from GenScript (Piscataway, USA) corresponding to amino acids 934-1105 of Uniprot Entry Q86U86 (PB1\_HUMAN), flanked by *Nde*I and *Eco*RI restriction sites to facilitate sub-cloning into the expression vector pTHREE-E. A construct corresponding to amino acids 361-600 of Uniprot Entry P53236 (RSC1-YEAST) was generated by PCR, using a full-length clone as a template, to create GST-BAH<sup>Rsc1</sup>. Restriction sites encoded by the PCR primers (*Nde*I/*Xho*I) were used for sub-cloning into the expression vector pTHREE-E.

### **Expression and purification of His-BAH-CT1**

The plasmid encoding His-BAH-CT1 was transformed into the *E. coli* strain Rosetta2 (DE3) pLysS (Merck Chemicals) for expression. 100 ml of L-broth (1% w/v tryptone, 0.5% w/v NaCl, 0.5% w/v yeast extract), supplemented with 100 µg/ml ampicillin and 34 µg/ml chloramphenicol, was inoculated with a single transformed bacterial colony. Following overnight growth at 37 °C, 10 ml was then used to inoculate 1 l of L-broth supplemented, as before, with antibiotics. The culture was grown in at 37 °C and to an A<sub>600</sub> of ~ 0.6. The temperature was

reduced to 20 °C and expression of Rsc2-BAH1-CT1 induced by the addition of IPTG to a final concentration of 0.4 mM. The culture was grown for a further 16-18 hours at 20 °C, after which the cells were harvested by centrifugation (4500 x *g*, 10 minutes, 10 °C), and the pellet stored at -80 °C until required.

The cell pellet arising from 4 l of cell culture was resuspended in 40 ml of buffer A: 50 mM HEPES.NaOH pH 7.5, 250 mM NaCl, 10 mM imidazole. Benzonase nuclease (Merck Chemicals) was added to the suspension (1000 Units), along with a single EDTA-free protease inhibitor tablet (Roche), and the cells disrupted by sonication. Cell debris and insoluble material were then removed by centrifugation at 40,000 x *g* for 30 minutes at 4°C.

The supernatant arising from this step was applied to a batch/gravity column containing 10 ml of Talon affinity resin (TaKaRa Bio) equilibrated in Buffer A. The column containing the cell extract and resin was rotated/rolled at 4 °C for a period of 1 hour to facilitate protein binding. The resin was allowed to pack under gravity, and then washed with successive applications of Buffer A (approximately 250 ml in total). Any retained protein was eluted from the column with the application of Buffer B: 50 mM HEPES.NaOH pH 7.5, 250 mM NaCl, 300 mM imidazole.

Fractions containing Rsc2-BAH-CT1 were identified by SDS-PAGE and then pooled. The affinity tag was cleaved from the protein by the addition of rhinovirus 3C-protease (PreScission protease, GE Healthcare) and incubation overnight at 4 °C.

The cleaved protein was then concentrated to a final volume of 10 ml using Vivaspin 20 (5000 MWCO) centrifugal concentrators (Sartorius Stedim Biotech) before loading onto a HiLoad Superdex 75 size exclusion column (GE Healthcare) equilibrated with Buffer C: 50 mM HEPES.NaOH pH 7.5, 500 mM NaCl, 1 mM TCEP, 1 mM EDTA. Fractions containing BAH-CT1 were again identified by SDS-PAGE, pooled and concentrated as before, to a final concentration of between 14 and 22 mg ml<sup>-1</sup>, then flash-frozen on dry ice and stored at -80 °C until required.

### **Expression and purification of GST-BAH fusion proteins**

Plasmids expressing GST, or wt or mutant GST-BAH constructs, were transformed into *E.coli* strain Rosetta2 (DE3) pLysS cells as above. 100 ml of Turbo Broth (Athena Enzyme Systems), supplemented with 100 µg/ml ampicillin and 34 µg/ml

chloramphenicol, was inoculated with a single transformed bacterial colony. This was grown at 37 °C until the  $A_{600}$  of the cell culture had reached 1, when protein expression was induced by the addition of IPTG to a final concentration of 0.4 mM. The culture was grown for a further 16-18 hours at 20°C, after which the cells were harvested by centrifugation (4500 x *g*, 10 minutes, 10°C), and the pellet stored at -80°C until required.

The cell pellet arising from 100ml of cell culture was resuspended in 10 ml of buffer A: 50 mM HEPES.NaOH pH 7.5, 1000 mM NaCl, 0.5 mM TCEP, and the cells disrupted by sonication. Cell debris and insoluble material were then removed by centrifugation at 40 000 x *g* for 30 minutes at 4°C. The supernatant arising from this step was applied to a batch/gravity column containing 1 ml of Glutathione Sepharose 4 Fast Flow resin (GE Healthcare) equilibrated in Buffer A. The column containing the cell extract and resin was rotated/rolled at 4°C for a period of 1 hour to facilitate protein binding. The resin was allowed to pack under gravity, and then washed with successive applications of Buffer A (approximately 25 ml in total).

### **Crystallization trials**

Crystallization trials were performed using the vapour-diffusion method in MRC 2 sitting-drop crystallization plates, with 22 mg/ml Rsc2-BAH-CT1, at 20 °C, and by mixing 200 nl of protein with 200 nl of the precipitant solution with diffusion against a well volume of 50  $\mu$ l. Crystals were obtained in several conditions from commercially available screens (Qiagen).

### **Crystallization and Data Collection**

Conditions were optimized in hanging drop plates at 20°C, mixing 1  $\mu$ l of protein at 14 mg ml<sup>-1</sup> with 1  $\mu$ l of precipitant: 100 mM HEPES.NaOH pH7.5, 0.2M (NH<sub>4</sub>)<sub>2</sub>SO<sub>4</sub>, 20-30% w/v PEG 3350, against a well volume of 500  $\mu$ l — a streak-seeding step was often necessary to produce crystals of a suitable size and quality. Crystals were cryo-protected for data collection by step-wise soaking in buffers containing increasing amounts of glycerol, to a final concentration of 30% (v/v).

Diffraction data were collected to 2.4 Å, on station I02, at the Diamond Light Source, Didcot, UK. Data were integrated and scaled using the software packages iMosflm (7) and Scala/truncate from the CCP4 suite (8).

The protein crystallized in spacegroup  $P2_1$  with unit-cell dimensions of  $a = 64.09$  Å;  $b = 64.07$  Å,  $c = 136.84$  Å;  $\alpha, \gamma = 90^\circ$ ;  $\beta = 95.47^\circ$ , with 4 molecules comprising the asymmetric unit. Statistics for the data collection are given in Table 1 in main text.

### Phasing and Refinement

A solution was determined by molecular replacement using the program PHASER (9) with our previously reported structure of the proximal BAH domain from BAF180 / Polybromo (PDB: 1W4S) as a search model. Iterative cycles of refinement and manual intervention (PHENIX: (10) and Coot: (11)) gave the final model — the quality of which was assessed by using MolProbity (12,13). Details of the model, along with Ramachandran and Molprobity statistics are also given in Table 1 in the main text.

### Thermal denaturation profiles of BAH-CT1 proteins

Samples containing 2.5  $\mu$ M protein and 5 x SYPRO Orange (diluted from a 5000 x stock supplied in DMSO; catalogue number S5692, Sigma-Aldrich) were prepared in 20 mM HEPES.NaOH pH 7.5, 200 mM NaCl, 1 mM TCEP, 1 mM EDTA.

Denaturation curves were monitored in 96-well PCR plates in a Roche LightCycler 480 II, using 465 and 580 nm filters for excitation and emission wavelengths, respectively. Temperature midpoints ( $T_m$ ) for each folded to unfolded transition were determined by non-linear regression fitting of a modified Boltzmann model (14) to normalized data in Prism5 (GraphPad Software)

$$Y = (a_n X + b_n) + \frac{(a_d X + b_d) - (a_n X + b_n)}{1 + e^{\frac{T_m - X}{m}}}$$

where:  $a_n$  and  $a_d$  are the slopes,  $b_n$  and  $b_d$  the y-intercepts, of the native and denatured baselines respectively.  $T_m$  is the melting temperature, and  $m$  a slope factor.

### SUPPLEMENTAL REFERENCES

1. Huang, J., Brito, I.L., Villen, J., Gygi, S.P., Amon, A. and Moazed, D. (2006) Inhibition of homologous recombination by a cohesin-associated clamp complex recruited to the rDNA recombination enhancer. *Genes Dev*, **20**, 2887-2901.

2. Tanny, J.C., Kirkpatrick, D.S., Gerber, S.A., Gygi, S.P. and Moazed, D. (2004) Budding yeast silencing complexes and regulation of Sir2 activity by protein-protein interactions. *Mol Cell Biol*, **24**, 6931-6946.
3. Kent, N.A., Chambers, A.L. and Downs, J.A. (2007) Dual Chromatin Remodeling Roles for RSC during DNA Double Strand Break Induction and Repair at the Yeast MAT Locus. *J Biol Chem*, **282**, 27693-27701.
4. DeMase, D., Zeng, L., Cera, C. and Fasullo, M. (2005) The *Saccharomyces cerevisiae* PDS1 and RAD9 checkpoint genes control different DNA double-strand break repair pathways. *DNA Repair (Amst)*, **4**, 59-69.
5. Norris, A., Bianchet, M.A. and Boeke, J.D. (2008) Compensatory interactions between Sir3p and the nucleosomal LRS surface imply their direct interaction. *PLoS Genet*, **4**, e1000301.
6. Longtine, M.S., McKenzie, A., Demarini, D.J., Shah, N.G., Wach, A., Brachat, A., Philippsen, P. and Pringle, J.R. (1998) Additional modules for versatile and economical PCR-based gene deletion and modification in *Saccharomyces cerevisiae*. *Yeast*, **14**, 953-961.
7. Leslie, A.G.W. (1992) Recent changes to the MOSFLM package for processing film and image plate data. *Joint CCP4 + ESF-EAMCB Newsletter on Protein Crystallography*, **26**.
8. CCP4. (1994) The CCP4 suite: programs for protein crystallography. *Acta Crystallogr D Biol Crystallogr*, **50**, 760-763.
9. McCoy, A.J. (2007) Solving structures of protein complexes by molecular replacement with Phaser. *Acta Crystallogr D Biol Crystallogr*, **63**, 32-41.
10. Adams, P.D., Grosse-Kunstleve, R.W., Hung, L.W., Ioerger, T.R., McCoy, A.J., Moriarty, N.W., Read, R.J., Sacchettini, J.C., Sauter, N.K. and Terwilliger, T.C. (2002) PHENIX: building new software for automated crystallographic structure determination. *Acta Crystallogr D Biol Crystallogr*, **58**, 1948-1954.
11. Emsley, P., Lohkamp, B., Scott, W.G. and Cowtan, K. (2010) Features and Development of Coot. *Acta Crystallogr D Biol Crystallogr*, **66**, 486-501.
12. Chen, V.B., Arendall, W.B., Headd, J.J., Keedy, D.A., Immormino, R.M., Kapral, G.J., Murray, L.W., Richardson, J.S. and Richardson, D.C. (2010) MolProbity: all-atom structure validation for macromolecular crystallography. *Acta Crystallogr D*, **66**, 12-21.
13. Davis, I.W., Murray, L.W., Richardson, J.S. and Richardson, D.C. (2004) MolProbity: structure validation and all-atom contact analysis for nucleic acids and their complexes. *Nucleic Acids Res*, **32**, W615-W619.
14. Ericsson, U.B., Hallberg, B.M., Detitta, G.T., Dekker, N. and Nordlund, P. (2006) Thermofluor-based high-throughput stability optimization of proteins for structural studies. *Analytical biochemistry*, **357**, 289-298.
15. Corpet, F. (1988) Multiple sequence alignment with hierarchical clustering. *Nucleic Acids Res*, **16**, 10881-10890.
16. Livingstone, C.D. and Barton, G.J. (1993) Protein sequence alignments: a strategy for the hierarchical analysis of residue conservation. *Comput Appl Biosci*, **9**, 745-756.
17. Kabsch, W. and Sander, C. (1983) Dictionary of protein secondary structure: pattern recognition of hydrogen-bonded and geometrical features. *Biopolymers*, **22**, 2577-2637.

**A**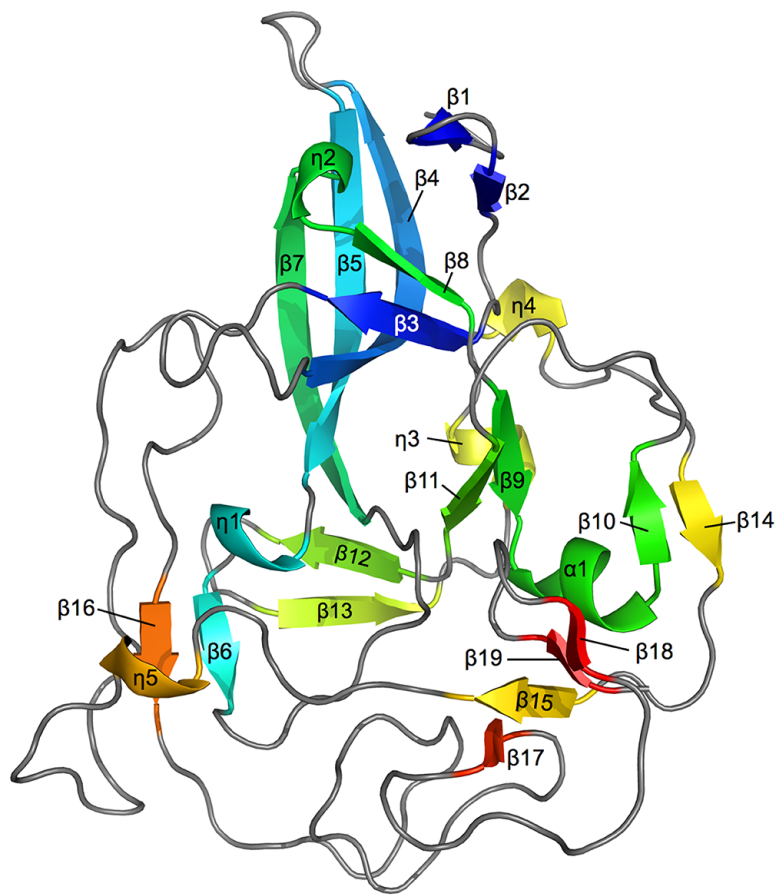**B**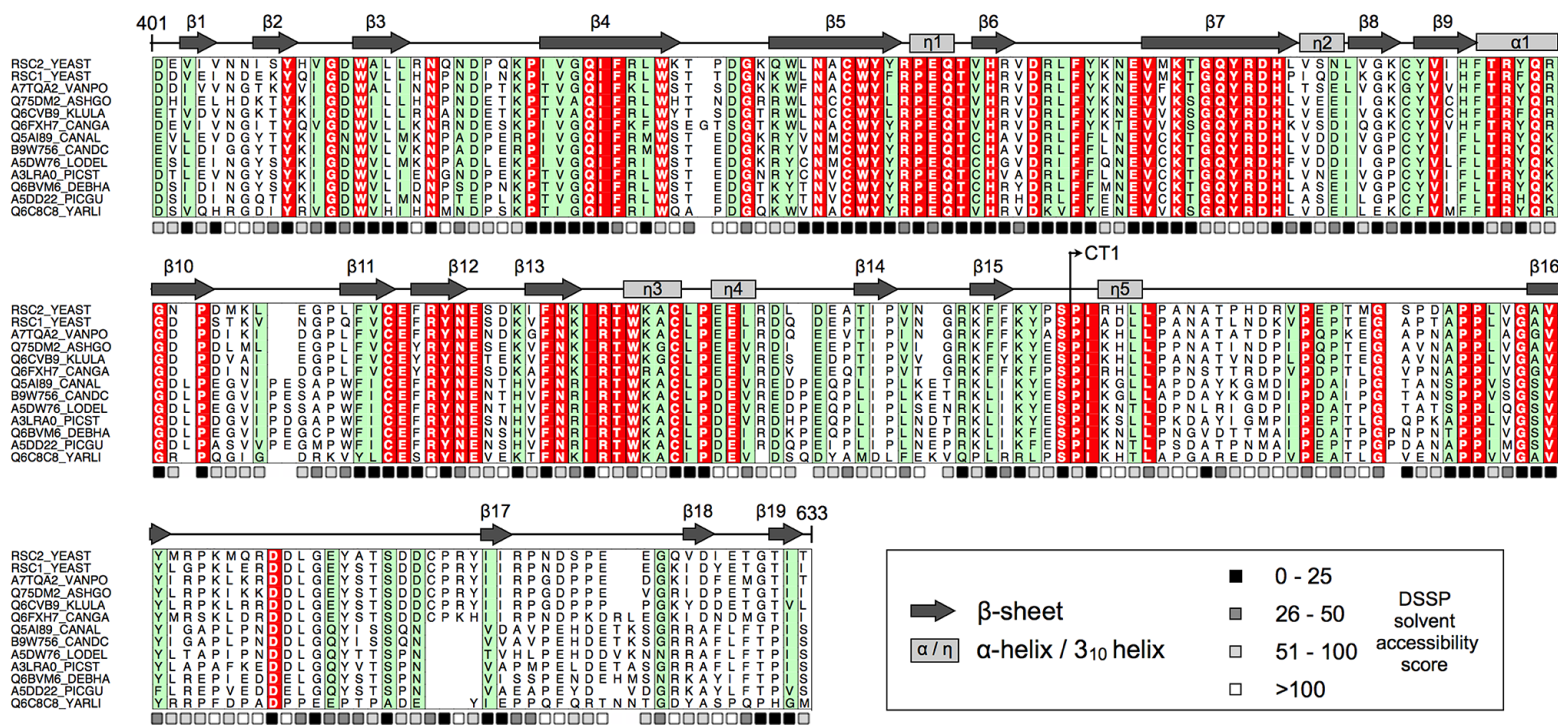

**Figure S1.** Analysis of the Rsc2 BAH-CT1 domain. **(A)** Secondary structure cartoon of Rsc2 BAH-CT1, coloured from blue through to red, from the visible N-terminus at residue 401 to the C-terminus at residue 633. Secondary structure elements are numbered sequentially from N- to C-terminus. **(B)** Amino acid sequences corresponding to the BAH-CT1 region of Rsc2-related proteins were retrieved from the Uniprot database (using the indicated accession codes), aligned using multi-align (15), then prepared for presentation using AMAS (16). Secondary structure elements corresponding to the Rsc2 BAH-CT1 structure presented in this study are also shown. Solvent accessibility was calculated with DSSP (17) for each amino acid residue of Rsc2 BAH-CT1.



**A**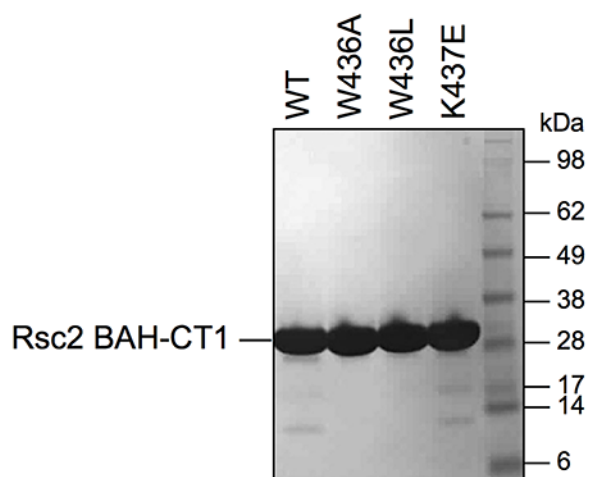**B**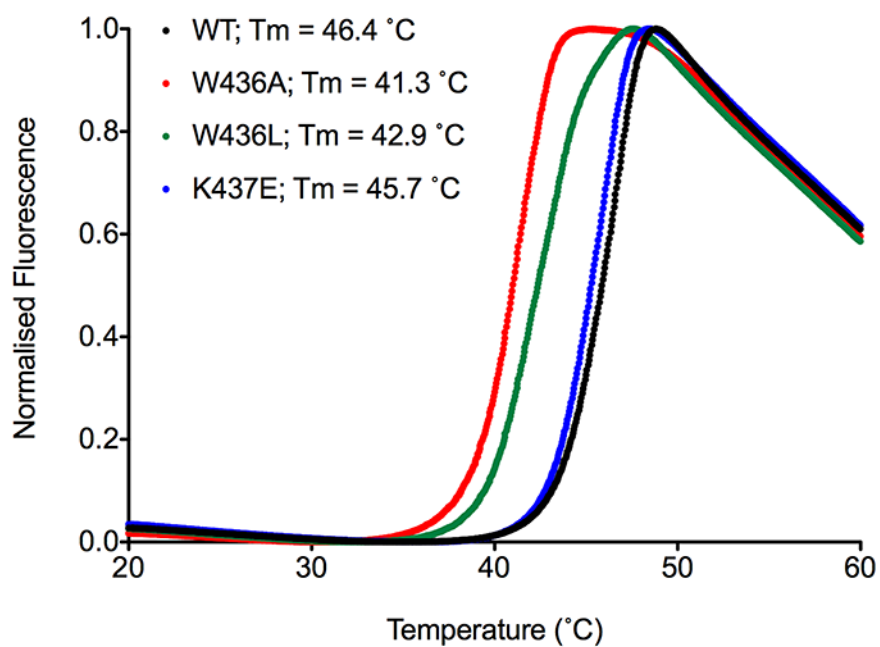

**Figure S2** Thermal stability of wild-type and mutant Rsc2 BAH-CT1 proteins. **(A)** SDS-PAGE analysis of purified recombinant Rsc2 BAH-CT1 proteins used for thermal denaturation experiments. **(B)** Thermal denaturation profiles of wt and mutant Rsc2 BAH-CT1 proteins.

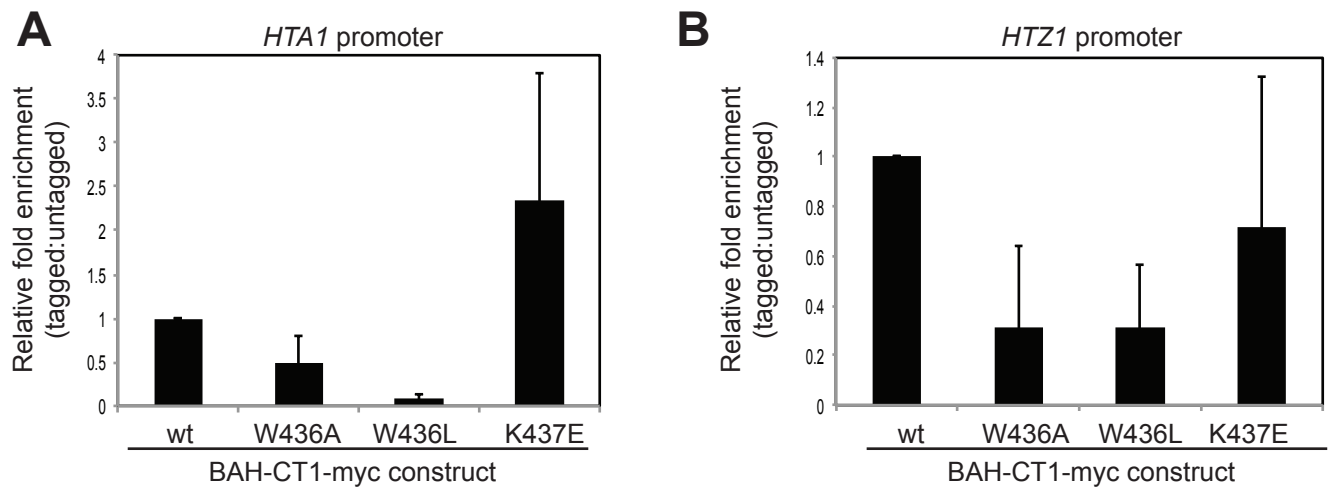

**Figure S3** Chromatin association of wild type and mutant Rsc2 BAH-CT1 proteins *in vivo*. **(A and B)** Chromatin immunoprecipitation assays examining enrichment of Myc-tagged overexpressed BAH-CT1 relative to the untagged control at the H2A promoter **(A)** or H2A.Z promoter **(B)**. Data shown are the mean enrichment of at least 3 independent experiments  $\pm$  1 SD. Average % input from the tagged strain (or untagged control strain) is listed in Table S1.
